# Supplementary material for: Mixed Transcriptome Analysis Revealed the Possible Interaction Mechanisms between Zizania latifolia and Ustilago esculenta Inducing Jiaobai Stem-Gall Formation
Source: MDPI journal article supplement (doi:10.3390/ijms222212258), 2021-11-12
Supplement: s1 [file s1]

## Supplementary Table

Table S1 Total mapping to the genome and gene set of *Z. latifolia*-*U. esculenta* interaction in the initial stage of stem gall formation

| Species             | Total Mapping of genome (%) |      |               | Total Mapping of gene set (%) |      |               |
|---------------------|-----------------------------|------|---------------|-------------------------------|------|---------------|
|                     | - 10 d                      | 0 d  | Average value | - 10 d                        | 0 d  | Average value |
| <i>Z.latifolia</i>  | 84.9                        | 83.1 | 84.03         | 67.5                          | 66.1 | 66.82         |
| <i>U. esculenta</i> | 3.87                        | 5.64 | 4.76          | 2.88                          | 4.24 | 3.56          |
