# Supplementary material for: Mixed Transcriptome Analysis Revealed the Possible Interaction Mechanisms between Zizania latifolia and Ustilago esculenta Inducing Jiaobai Stem-Gall Formation
Source: MDPI journal article supplement (doi:10.3390/ijms222212258), 2021-11-12
Supplement: s1 [file s1]

## Supplementary caption

### Supplementary results

The GO and KEGG analysis of DEGs of both *U. esculenta* and *Z. latifolia*

### Supplementary Figures Captions

**Figure S1.** Pearson correlation coefficient heatmap of all gene expression between the two stages (–10 d before and 0 d) of stem gall formation. A. *U. esculenta*. B. *Z. latifolia*

**Figure S2.** Functional annotation of DEGs between the two stages (–10 d before and 0 d) of stem gall formation based on the *U. esculenta* genome. A. GO enrichment of DEGs. B. KEGG enrichment of DEGs

**Figure S3.** Functional annotation of DEGs between the two stages (–10 d before and 0 d) of stem gall formation based on the *U. esculenta* genome. A. GO classification. Each DEG was classified into at least one GO term and grouped into three categories: biological process, cellular component and molecular function. B. Pathway assignment based on KEGG. DEGs were grouped into cellular processes, environmental information processing, genetic information processing, metabolism, and organismal systems

**Figure S4.** Functional annotation of DEGs between the two stages (–10 d before and 0 d) of stem gall formation based on the *Z. latifolia* genome. A. GO enrichment of DEGs. B. KEGG enrichment of DEGs

**Figure S5.** Functional annotation of DEGs between the two stages (–10 d before and 0 d) of stem gall formation based on the *Z. latifolia* genome. A. GO classification of DEGs. B. Pathway assignment based on KEGG of DEGs

**Figure S6.** DEGs of PR genes in the initial stage of stem gall formation

**Figure S7.** The complete protein sequences of 11 DEGs C2H2 zinc finger proteins were aligned by ClustalW

**Figure S8.** Structural analysis of the C2H2 zinc finger proteins family.

### Supplementary Tables Captions

**Table S1.** Total mapping to the genome and gene set of *Z. latifolia*-*U. esculenta* interaction in the initial stage of stem gall formation

**Table S2.** GO enrichment analysis of DEGs of *U. esculenta* in the initial stage of stem gall formation

**Table S3.** KEGG enrichment analysis of DEGs of *U. esculenta* in the initial stage of stem gall formation

**Table S4.** List of DEGs of *U. esculenta* involved in KEGG pathways in the initial stage of stem gall formation

**Table S5.** GO enrichment analysis of DEGs of *Z. latifolia* in the initial stage of stem gall formation

**Table S6.** KEGG enrichment analysis of DEGs of *Z. latifolia* in the initial stage of stem gall formation

**Table S7.** DEGs related to plant hormone metabolism and signaling of *Z. latifolia* in the initial stage of stem gall formation

**Table S8.** Genes involved in IAA biosynthesis in *U. esculenta* and *Z. latifolia*

**Table S9.** Conserved motifs in *Z. latifolia* YUCCA proteins

**Table S10.** The expression profiles of genes involved in IAA biosynthesis in *U. esculenta* and *Z. latifolia*

**Table S11.** C2H2 zinc finger proteins of *U. esculenta*

**Table S12.** Prediction of C2H2 zinc finger binding sites in the promoter region of ZIYUCCA9

**Table S13.** Primer sequences for qRT-PCR
