# Supplementary figures and images for: Mixed Transcriptome Analysis Revealed the Possible Interaction Mechanisms between Zizania latifolia and Ustilago esculenta Inducing Jiaobai Stem-Gall Formation
Source: MDPI journal article supplement (doi:10.3390/ijms222212258), 2021-11-12

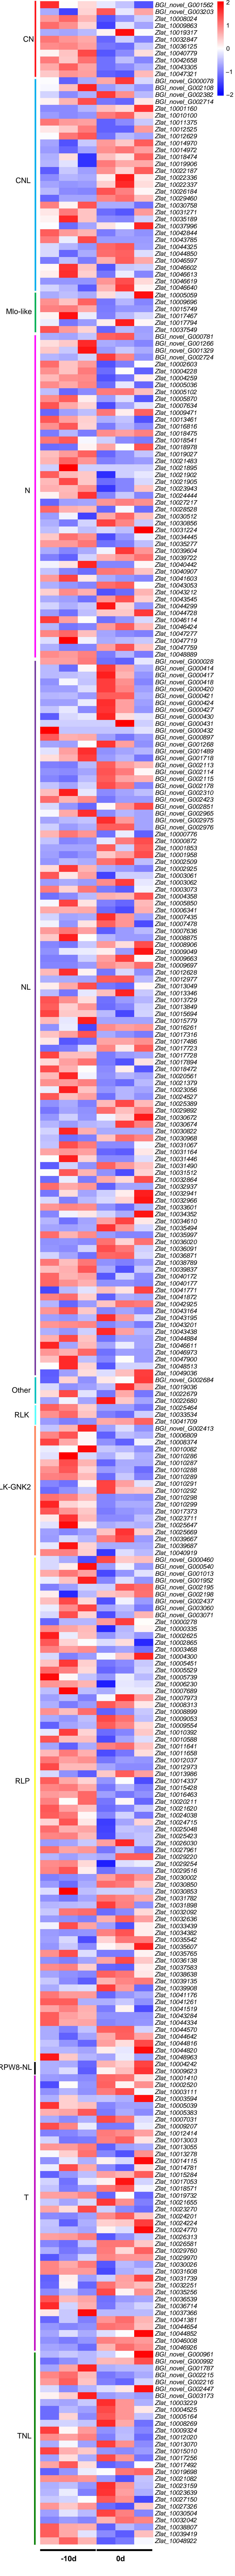

Supplement: s1 [file s1]
